# Supplementary material for: Genome of a Low-Salinity Ammonia-Oxidizing Archaeon Determined by Single-Cell and Metagenomic Analysis
Source: PLoS One. 2011 Feb 22;6(2):e16626. doi: 10.1371/journal.pone.0016626 (PMC3043068; doi:10.1371/journal.pone.0016626)
Supplement: Table S1 — Genes in N. limnia that are putatively involved in ammonia oxidation and respiration (Table modified from Walker et al., 2010). (XLS) [file pone.0016626.s004.xls]

## Sheet: sup. table
Table S1. Genes in N. limnia that are putatively involved in ammonia oxidation and respiration (table modified from Walker et al., 2010).
N. limnia Gene Locus Tag	Annotation	N. maritimus putative homolog	C. symbiosum A putative homolog
Nlim_1186	4Fe-4S ferredoxin iron-sulfur binding domain-containing protein	Nmar_0281	CENSYa_1669
Nlim_1407	ABC transporter related	Nmar_1654	CENSYa_1054
Nlim_1406	ABC-3 protein	Nmar_1653	CENSYa_1053
Nlim_1891	ammonia monooxygenase operon-associated hypothetical protein	Nmar_1501	CENSYa_0401
Nlim_1890	ammonia monooxygenase, subunit A (AmoA)	Nmar_1500	CENSYa_0402
Nlim_1893	ammonia monooxygenase, subunit B (AmoB)	Nmar_1503	CENSYa_0394
Nlim_1892	ammonia monooxygenase, subunit C (AmoC)	Nmar_1502	CENSYa_0399
Nlim_1421	ammonium transporter	Nmar_1698	CENSYa_1453
Nlim_1564	ammonium transporter	Nmar_0588	n/a
Nlim_1946	blue (type1) copper domain-containing protein	Nmar_1142	CENSYa_0003
Nlim_1403	blue (type1) copper domain-containing protein	Nmar_1273	CENSYa_1796
Nlim_1494	blue (type1) copper domain-containing protein	Nmar_1678	n/a
Nlim_0952	blue (type1) copper domain-containing protein	Nmar_1226	CENSYa_0530
Nlim_0803*	blue (type1) copper domain-containing protein	Nmar_1102	CENSYa_0033
Nlim_1830	blue (type1) copper domain-containing protein	Nmar_1443	CENSYa_0033
Nlim_1536	blue (type1) copper domain-containing protein	Nmar_0004	n/a
Nlim_0988	blue (type1) copper domain-containing protein	Nmar_1665	CENSYa_0033
Nlim_1127	blue (type1) copper domain-containing protein	n/a	n/a
Nlim_1617*	blue (type1) copper domain-containing protein	n/a	n/a
Nlim_1317	blue (type1) copper domain-containing protein	Nmar_0185	CENSYa_1982
Nlim_1405	copper resistance D domain-containing protein	Nmar_1652	CENSYa_1798
Nlim_1075	cupredoxin blue copper protein	Nmar_1650	CENSYa_1795
Nlim_1947	cytochrome b/b6 domain-containing protein	Nmar_1543	CENSYa_0002
Nlim_1318	cytochrome c oxidase subunit I	Nmar_0184	CENSYa_1981
Nlim_1319	cytochrome c oxidase subunit II	Nmar_0183	CENSYa_1980
Nlim_1282	HxlR family transcriptional regulator	Nmar_1661	n/a
Nlim_1404	hypothetical protein with signal-peptide and transmembrane regions	Nmar_1651	CENSYa_1797
Nlim_1320	hypothetical protein with signal-peptide and transmembrane regions	Nmar_0182	CENSYa_1979
Nlim_1275	mulitcopper oxidase	n/a	n/a
Nlim_0966	multicopper oxidase type 3	Nmar_1354	CENSYa_1582
Nlim_1137	multicopper oxidase type 3	Nmar_1663	CENSYa_1582
Nlim_1187	NADH dehydrogenase (quinone)	Nmar_0280	CENSYa_1668
Nlim_1188	NADH dehydrogenase (quinone)	Nmar_0279	CENSYa_1667
Nlim_1189	NADH dehydrogenase (ubiquinone), 30 kDa subunit	Nmar_0278	CENSYa_1666
Nlim_1190	NADH-quinone oxidoreductase, B subunit	Nmar_0277	CENSYa_1665
Nlim_1184	NADH-ubiquinone oxidoreductase chain 4L	Nmar_0283	CENSYa_1671
Nlim_1191	NADH-ubiquinone/plastoquinone oxidoreductase chain 3	Nmar_0276	CENSYa_1664
Nlim_1185	NADH-ubiquinone/plastoquinone oxidoreductase chain 6	Nmar_0282	CENSYa_1670
Nlim_1007	NirK, nitrite reductase multicopper oxidase	Nmar_1259	n/a
Nlim_0562	nitroreductase	Nmar_0709	n/a
Nlim_1091	nitroreductase	Nmar_1696	n/a
Nlim_1080	nitroreductase	n/a	n/a
Nlim_1408	periplasmic solute binding protein	Nmar_1655	CENSYa_1055
Nlim_1182	proton-translocating NADH-quinone oxidoreductase, chain L	Nmar_0285	CENSYa_1673
Nlim_1183	proton-translocating NADH-quinone oxidoreductase, chain M	Nmar_0284	CENSYa_1672
Nlim_1181	proton-translocating NADH-quinone oxidoreductase, chain N	Nmar_0286	CENSYa_1674
Nlim_1136	putative metal cation transporter	Nmar_1130	CENSYa_1581
Nlim_1948	Rieske (2Fe-2S) domain-containing protein	Nmar_1544	CENSYa_0001
Nlim_1409	transcription factor, NikR, nickel binding C-terminal	Nmar_1656	CENSYa_1056
Nlim_0651	uncharacterized conserved protein with putative cation binding motif	Nmar_1353	CENSYa_1879
*pseudogenes
